# Supplementary material for: Isolation, Identification and Genetic Characterization of Antibiotic Resistant Escherichia coli from Frozen Chicken Meat Obtained from Supermarkets at Dhaka City in Bangladesh
Source: MDPI journal article supplement (doi:10.3390/antibiotics12010041), 2022-12-27
Supplement: s1 [file s1]

**Supplementary Table S1.** Antimicrobial resistance patterns of *E. coli* (n=50).

| No. of antibiotic | Antimicrobial resistance pattern | No. of antimicrobial classes in pattern (MDR) <sup>a</sup> | No. of isolate (%) |
|-------------------|----------------------------------|------------------------------------------------------------|--------------------|
| 1 (3 isolates)    | Sul                              | 1(no)                                                      | 1(2.00)            |
|                   | Str                              | 1(no)                                                      | 1(2.00)            |
|                   | Gen                              | 1(no)                                                      | 1(2.00)            |
| 2 (2 isolates)    | Tet-Chl                          | 2(no)                                                      | 1(2.00)            |
|                   | Ery-Chl                          | 2(no)                                                      | 1(2.00)            |
| 3 (19 isolates)   | Tet-Ery-Sul                      | 3(yes)                                                     | 2(4.00)            |
|                   | Gen-Amp-Ery                      | 3(yes)                                                     | 1(2.00)            |
|                   | Str-Tet-Amp                      | 3(yes)                                                     | 1(2.00)            |
|                   | Tet-Amp-Ery                      | 3(yes)                                                     | 2(4.00)            |
|                   | Str-Ery-Sul                      | 3(yes)                                                     | 2(4.00)            |
|                   | Str-Tet-Sul                      | 3(yes)                                                     | 2(4.00)            |
|                   | Str-Gen-Amp                      | 2(no)                                                      | 1(2.00)            |
|                   | Ery-Chlo-Sul                     | 3(yes)                                                     | 1(2.00)            |
|                   | Str-Chlo-Sul                     | 3(yes)                                                     | 1(2.00)            |
|                   | Gen-Tet-Ery                      | 3(yes)                                                     | 1(2.00)            |
|                   | Gen-Amp-Ery                      | 3(yes)                                                     | 1(2.00)            |
|                   | Str-Gen-Ery                      | 2(no)                                                      | 1(2.00)            |
|                   | Gen-Ery-Sul                      | 3(yes)                                                     | 1(2.00)            |
|                   | Gen-Tet-Amp                      | 3(yes)                                                     | 1(2.00)            |
|                   | Str-Gen-Chlo                     | 2(no)                                                      | 1(2.00)            |
|                   | Str-Tet-Ery-Sul                  | 4(yes)                                                     | 2(4.00)            |
|                   | Str-Gen-Tet-Ery                  | 3(yes)                                                     | 1(2.00)            |
|                   | Tet-Amp-Ery-Sul                  | 4(yes)                                                     | 4(8.00)            |
|                   | Str-Gen-Chlo-Sul                 | 3(yes)                                                     | 1(2.00)            |
|                   | Gen-Amp-Ery-Chl                  | 4(yes)                                                     | 1(2.00)            |
| 4 (17 isolates)   | Gen-Tet-Chl-Sul                  | 4(yes)                                                     | 1(2.00)            |
|                   | Str-Gen-Tet-Sul                  | 3(yes)                                                     | 2(4.00)            |
|                   | Str-Tet-Amp-Chl                  | 4(yes)                                                     | 1(2.00)            |
|                   | Str-Tet-Amp-Ery                  | 4(yes)                                                     | 1(2.00)            |
|                   | Str-Tet-Chl-Sul                  | 4(yes)                                                     | 1(2.00)            |
|                   | Str-Ery-Chl-Sul                  | 4(yes)                                                     | 1(2.00)            |
|                   | Gen-Tet-Amp-Ery                  | 4(yes)                                                     | 1(2.00)            |
|                   | Str-Tet-Amp-Chl-Sul              | 5(yes)                                                     | 1(2.00)            |
|                   | Str-Tet-Amp-Ery-Sul              | 5(yes)                                                     | 2(4.00)            |
|                   | Str-Gen-Tet-Ery-Sul              | 4(yes)                                                     | 1(2.00)            |
| 5 (6 isolates)    | Str-Gen-Tet-Amp-Ery              | 4(yes)                                                     | 1(2.00)            |
|                   | Str-Gen-Tet-Ery-Chl              | 4(yes)                                                     | 1(2.00)            |
|                   | Str-Gen-Tet-Amp-Chl-Sul          | 5(yes)                                                     | 1(2.00)            |
|                   | Str-Gen-Tet-Amp-Ery-Sul          | 5(yes)                                                     | 1(2.00)            |
|                   | Str-Gen-Tet-Amp-Ery-Chl-Sul      | 6(yes)                                                     | 1(2.00)            |
| 6 (2 isolates)    | Str-Gen-Tet-Amp-Ery-Chl-Sul      | 6(yes)                                                     | 1(2.00)            |
|                   | Sul                              |                                                            |                    |

<sup>a</sup> an isolate is defined as multidrug-resistant when it shows resistance to >2 classes of antimicrobial agents

Str: Streptomycin, Gen: Gentamicin, Tet: Tetracycline, Amp: Ampicillin, Erythromycin, Chl: Chloramphenicol, Sul: Sulfonamide

**Supplementary Table S2.** Pairwise association analysis of phenotypic antimicrobial resistance patterns.

| Outcome (O)  | O+ | Predictor (P)   | P+ | O+/P+ (a) | O+/P- (b) | O-/P+ © | O-/P- (d) | Odds Ratio | 95% CI     | p    |
|--------------|----|-----------------|----|-----------|-----------|---------|-----------|------------|------------|------|
| Streptomycin | 29 | Gentamycin      | 22 | 13        | 16        | 9       | 12        | 1.08       | 0.35-3.36  | 0.88 |
|              |    | Tetracycline    | 33 | 20        | 9         | 13      | 8         | 1.37       | 0.42-4.45  | 0.6  |
|              |    | Ampicillin      | 22 | 11        | 18        | 11      | 10        | 0.55       | 0.18-1.73  | 0.31 |
|              |    | Erythromycin    | 31 | 15        | 14        | 16      | 5         | 0.33       | 0.10-1.16  | 0.08 |
|              |    | Chloramphenicol | 15 | 10        | 19        | 5       | 16        | 1.68       | 0.48-5.95  | 0.42 |
|              |    | Sulfonamide     | 29 | 19        | 10        | 10      | 11        | 2.09       | 0.66-6.59  | 0.21 |
| Gentamycin   | 22 | Tetracycline    | 33 | 13        | 9         | 20      | 8         | 0.58       | 0.18-1.88  | 0.36 |
|              |    | Ampicillin      | 22 | 10        | 12        | 12      | 16        | 1.11       | 0.36-3.42  | 0.85 |
|              |    | Erythromycin    | 31 | 13        | 9         | 18      | 10        | 0.8        | 0.25-2.53  | 0.71 |
|              |    | Chloramphenicol | 15 | 7         | 15        | 8       | 20        | 1.17       | 0.35-3.93  | 0.8  |
|              |    | Sulfonamide     | 29 | 9         | 13        | 20      | 8         | 0.28       | 0.09-0.90  | 0.03 |
|              |    | Ampicillin      | 22 | 18        | 15        | 4       | 13        | 3.9        | 1.05-14.51 | 0.04 |
| Tetracycline | 33 | Erythromycin    | 31 | 21        | 12        | 10      | 7         | 1.2        | 0.37-4.06  | 0.71 |
|              |    | Chloramphenicol | 15 | 8         | 25        | 7       | 10        | 0.46       | 0.13-1.60  | 0.22 |
|              |    | Sulfonamide     | 29 | 21        | 12        | 8       | 9         | 1.97       | 0.60-6.46  | 0.26 |
|              |    | Erythromycin    | 31 | 16        | 6         | 15      | 13        | 2.31       | 0.70-7.65  | 0.17 |
| Ampicillin   | 22 | Chloramphenicol | 15 | 5         | 17        | 10      | 18        | 0.53       | 0.15-1.87  | 0.32 |
|              |    | Sulfonamide     | 29 | 10        | 12        | 19      | 9         | 0.39       | 0.12-1.25  | 0.12 |
|              |    | Chloramphenicol | 15 | 6         | 25        | 9       | 10        | 0.27       | 0.08-0.95  | 0.04 |
| Erythromycin | 31 | Sulfonamide     | 29 | 18        | 13        | 11      | 8         | 1.01       | 0.32-3.20  | 0.99 |
|              |    | Sulfonamide     | 29 | 9         | 6         | 20      | 15        | 1.13       | 0.33-3.85  | 0.85 |

**Supplementary Table S3.** Pairwise association analysis antimicrobial resistance genes (ARGs).

| Outcome          | O+ | Predictor                 | P+ | O+/P+ (a) | O+/P- (b) | O-/P+ © | O-/P- (d) | Odds Ratio | 95% CI            | p    |
|------------------|----|---------------------------|----|-----------|-----------|---------|-----------|------------|-------------------|------|
| <i>aadA1</i>     | 28 | <i>aac(3)-IV</i>          | 22 | 13        | 15        | 9       | 13        | 1.25       | 0.4049 to 3.8703  | 0.70 |
|                  |    | <i>tet(A)</i>             | 33 | 19        | 9         | 14      | 8         | 1.21       | 0.3721 to 3.9113  | 0.76 |
|                  |    | <i>tet(B)</i>             | 30 | 17        | 11        | 13      | 9         | 1.07       | 0.3425 to 3.3424  | 0.91 |
|                  |    | <i>bla<sub>CITM</sub></i> | 24 | 13        | 15        | 11      | 11        | 0.87       | 0.2833 to 2.6511  | 0.80 |
|                  |    | <i>bla<sub>SHV</sub></i>  | 20 | 12        | 16        | 8       | 14        | 1.31       | 0.4170 to 4.1313  | 0.64 |
|                  |    | <i>ereA</i>               | 32 | 15        | 13        | 17      | 5         | 0.34       | 0.0979 to 1.1767  | 0.09 |
|                  |    | <i>cmlA</i>               | 17 | 9         | 19        | 8       | 14        | 0.83       | 0.2557 to 2.6877  | 0.75 |
|                  |    | <i>Cat1</i>               | 18 | 13        | 15        | 5       | 17        | 2.95       | 0.8499 to 10.2167 | 0.09 |
|                  |    | <i>Sul1</i>               | 28 | 17        | 11        | 11      | 11        | 1.55       | 0.4999 to 4.7774  | 0.44 |
| <i>aac(3)-IV</i> | 22 | <i>tet(A)</i>             | 33 | 14        | 8         | 19      | 9         | 0.83       | 0.2557 to 2.6877  | 0.75 |
|                  |    | <i>tet(B)</i>             | 30 | 13        | 9         | 17      | 11        | 0.94       | 0.2992 to 2.9198  | 0.91 |
|                  |    | <i>bla<sub>CITM</sub></i> | 24 | 13        | 9         | 11      | 17        | 2.23       | 0.7146 to 6.9737  | 0.17 |
|                  |    | <i>bla<sub>SHV</sub></i>  | 20 | 10        | 12        | 10      | 18        | 1.5        | 0.4793 to 4.6948  | 0.49 |
|                  |    | <i>ereA</i>               | 32 | 13        | 9         | 19      | 9         | 0.68       | 0.2140 to 2.1880  | 0.52 |
|                  |    | <i>cmlA</i>               | 17 | 5         | 17        | 12      | 16        | 0.39       | 0.1127 to 1.3644  | 0.14 |
|                  |    | <i>Cat1</i>               | 18 | 7         | 15        | 11      | 17        | 0.72       | 0.2228 to 2.3349  | 0.59 |
|                  |    | <i>Sul1</i>               | 28 | 10        | 12        | 18      | 10        | 0.46       | 0.1479 to 1.4490  | 0.19 |
| <i>tet(A)</i>    | 33 | <i>tet(B)</i>             | 30 | 20        | 13        | 10      | 7         | 1.08       | 0.3270 to 3.5465  | 0.90 |
|                  |    | <i>bla<sub>CITM</sub></i> | 24 | 16        | 17        | 8       | 9         | 1.06       | 0.3280 to 3.4177  | 0.92 |
|                  |    | <i>bla<sub>SHV</sub></i>  | 20 | 14        | 19        | 6       | 11        | 1.35       | 0.4025 to 4.5339  | 0.62 |
|                  |    | <i>ereA</i>               | 32 | 21        | 12        | 11      | 6         | 0.94       | 0.2813 to 3.2388  | 0.94 |
|                  |    | <i>cmlA</i>               | 17 | 11        | 22        | 6       | 11        | 0.92       | 0.2679 to 3.1367  | 0.89 |
|                  |    | <i>Cat1</i>               | 18 | 11        | 22        | 7       | 10        | 0.71       | 0.2136 to 2.3881  | 0.58 |
|                  |    | <i>Sul1</i>               | 28 | 20        | 13        | 8       | 9         | 1.73       | 0.5313 to 5.6379  | 0.36 |
| <i>tet(B)</i>    | 30 | <i>bla<sub>CITM</sub></i> | 24 | 15        | 15        | 9       | 11        | 1.22       | 0.3928 to 3.8027  | 0.73 |
|                  |    | <i>bla<sub>SHV</sub></i>  | 20 | 13        | 17        | 7       | 13        | 1.42       | 0.4414 to 4.5697  | 0.56 |
|                  |    | <i>ereA</i>               | 32 | 19        | 11        | 13      | 7         | 0.93       | 0.2854 to 3.0311  | 0.90 |

|                           |    |                          |    |    |    |    |    |      |                   |       |
|---------------------------|----|--------------------------|----|----|----|----|----|------|-------------------|-------|
|                           |    | <i>cmlA</i>              | 17 | 12 | 18 | 5  | 15 | 2    | 0.5740 to 6.9681  | 0.28  |
|                           |    | <i>Cat1</i>              | 18 | 11 | 19 | 7  | 13 | 1.08 | 0.3299 to 3.5040  | 0.90  |
|                           |    | <i>Sul1</i>              | 28 | 19 | 11 | 9  | 11 | 2.11 | 0.6670 to 6.6818  | 0.20  |
| <i>bla<sub>CITM</sub></i> | 24 | <i>bla<sub>SHV</sub></i> | 20 | 10 | 14 | 10 | 16 | 1.14 | 0.3682 to 3.5472  | 0.82  |
|                           |    | <i>ereA</i>              | 32 | 17 | 7  | 15 | 11 | 1.78 | 0.5501 to 5.7657  | 0.34  |
|                           |    | <i>cmlA</i>              | 17 | 7  | 17 | 10 | 16 | 0.66 | 0.2019 to 2.1501  | 0.49  |
|                           |    | <i>Cat1</i>              | 18 | 9  | 15 | 9  | 17 | 1.13 | 0.3568 to 3.5999  | 0.83  |
|                           |    | <i>Sul1</i>              | 28 | 8  | 16 | 20 | 6  | 0.15 | 0.0431 to 0.5215  | 0.002 |
| <i>bla<sub>SHV</sub></i>  | 20 | <i>ereA</i>              | 32 | 13 | 7  | 19 | 11 | 1.08 | 0.3299 to 3.5040  | 0.90  |
|                           |    | <i>cmlA</i>              | 17 | 6  | 14 | 11 | 19 | 0.74 | 0.2206 to 2.4845  | 0.63  |
|                           |    | <i>Cat1</i>              | 18 | 10 | 10 | 8  | 22 | 2.75 | 0.8341 to 9.0662  | 0.10  |
|                           |    | <i>Sul1</i>              | 28 | 9  | 11 | 19 | 11 | 0.47 | 0.1497 to 1.4992  | 0.20  |
| <i>ereA</i>               | 32 | <i>cmlA</i>              | 17 | 9  | 23 | 8  | 10 | 0.49 | 0.1462 to 1.6363  | 0.25  |
|                           |    | <i>Cat1</i>              | 18 | 9  | 23 | 9  | 9  | 0.39 | 0.1175 to 1.3033  | 0.13  |
|                           |    | <i>Sul1</i>              | 28 | 18 | 14 | 10 | 8  | 1.03 | 0.3215 to 3.2904  | 0.96  |
| <i>cmlA</i>               | 17 | <i>Cat1</i>              | 18 | 9  | 8  | 9  | 24 | 3    | 0.8837 to 10.1847 | 0.08  |
|                           |    | <i>Sul1</i>              | 28 | 10 | 7  | 18 | 15 | 1.19 | 0.3643 to 3.8908  | 0.77  |
| <i>Cat1</i>               | 18 | <i>Sul1</i>              | 28 | 12 | 6  | 16 | 16 | 2    | 0.6022 to 6.6419  | 0.26  |

---
